# Supplementary material for: Predictive performance of international COVID-19 mortality forecasting models
Source: PubMed Central journal article supplement (PMC8110547; doi:10.1038/s41467-021-22457-w), 2021-05-10
Supplement: 41467_2021_22457_MOESM2_ESM.pdf [file 41467_2021_22457_MOESM2_ESM.pdf]

**Title: Supplementary Data 1**

**Description:** This CSV file contains the data stemming from the systematic review process.
